# Supplementary material
Source: PubMed Central journal article supplement (PMC8189665)
Supplement: NIHMS991173-supplement-Other_Supplemental_Files.pdf [file NIHMS991173-supplement-Other_Supplemental_Files.pdf]

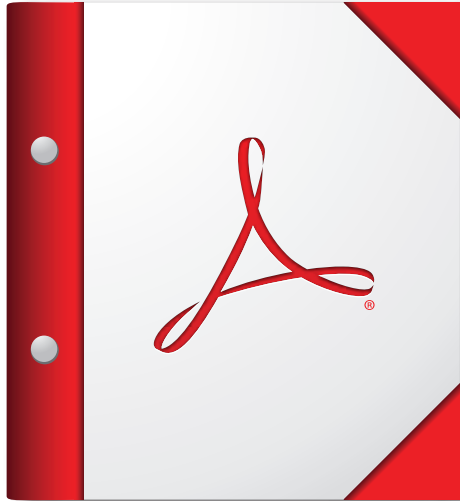

**For the best experience, open this PDF portfolio in  
Acrobat X or Adobe Reader X, or later.**

[Get Adobe Reader Now!](#)
