# Supplementary material
Source: PubMed Central journal article supplement (PMC8189665)
Supplement: NIHMS991173-supplement-Supplemental_Tables.pdf [file NIHMS991173-supplement-Supplemental_Tables.pdf]

**Table S1.** Characteristics of Trials Used to Estimate Intraclass Correlation Coefficients

| <b>Trial</b>                                                          | <b>Study Design</b>                               | <b>Inclusion Criteria</b>                                                                                 | <b>Exclusion Criteria</b>                                                                                                                                                                                                                                                                                                                                                                                                                                                    | <b>Treatment Groups</b>                                                                                                                                                                                |
|-----------------------------------------------------------------------|---------------------------------------------------|-----------------------------------------------------------------------------------------------------------|------------------------------------------------------------------------------------------------------------------------------------------------------------------------------------------------------------------------------------------------------------------------------------------------------------------------------------------------------------------------------------------------------------------------------------------------------------------------------|--------------------------------------------------------------------------------------------------------------------------------------------------------------------------------------------------------|
| Cervical Pessary ProTWIN Trial (Liem) <sup>15</sup>                   | Multicentre, open-label RCT                       | Women with a multiple pregnancy 12-20 weeks' gestation                                                    | Known serious congenital defects, fetal death, twin-to-twin transfusion syndrome, known placenta previa                                                                                                                                                                                                                                                                                                                                                                      | Cervical pessary inserted 16-20 weeks' gestation and removed in the 36th week of gestation vs no cervical pessary                                                                                      |
| Progestogen Individual Patient Data Meta-Analysis - Rode <sup>4</sup> | Multicentre, double-blind, placebo-controlled RCT | Women with a live, diamniotic twin pregnancy and chorionicity assessed by ultrasound <16 weeks' gestation | Age <18 years, known allergy to progesterone or peanuts, history of hormone-associated thromboembolic disorders, rupture of membranes, treatment for signs of twin-to-twin transfusion syndrome, intentional fetal reduction, known major structural or chromosomal fetal abnormality, known or suspected malignancy in genitals or breasts, known liver disease, higher-order multiple pregnancies, women who did not speak and understand Danish or German, as appropriate | Vaginal progesterone pessaries (200mg) vs vaginal placebo pessaries self-administered daily from 20+0-23+6 weeks' gestation until 33+6 weeks' or occurrence of either rupture of membranes or delivery |
| - Rouse <sup>17</sup>                                                 | Multicentre, double-blind, placebo-controlled RCT | Women carrying twins 16+0-20+3 weeks' gestation                                                           | Serious fetal anomalies, spontaneous death of a fetus >12 weeks, presumed monoamniotic placenta, suspected twin-to-twin transfusion syndrome, marked ultrasonographic growth discordance, planned nonstudy progesterone therapy >16 weeks, in-place or planned cerclage, major uterine anomaly, treatment with 10,000 or more units of unfractionated heparin per day, treatment with low-molecular-weight heparin at any dose, major                                        | Weekly intramuscular injections of 17Pc (250mg) vs placebo starting at 16+0-20+6 weeks' gestation and continuing until the end of the 34th week of gestation or delivery                               |

|                       |                                                     |                                                                                                                                                           |                                                                                                                                                                                                                                                                                                                                                                                                                                                                                                |                                                                                                                                                    |
|-----------------------|-----------------------------------------------------|-----------------------------------------------------------------------------------------------------------------------------------------------------------|------------------------------------------------------------------------------------------------------------------------------------------------------------------------------------------------------------------------------------------------------------------------------------------------------------------------------------------------------------------------------------------------------------------------------------------------------------------------------------------------|----------------------------------------------------------------------------------------------------------------------------------------------------|
| - Lim <sup>18</sup>   | Multicentre, double-blind, placebo-controlled RCT   | Women with a multiple pregnancy 15-19 weeks' gestation and chorionicity determined by ultrasonography                                                     | chronic medical diseases, twin gestations that were the result of intentional fetal reduction<br>Women with a previous spontaneous preterm birth <34 weeks, serious congenital defects or death of one or more fetuses, early signs of twin-to-twin transfusion syndrome, primary cerclage                                                                                                                                                                                                     | Weekly intramuscular injections of 17Pc (250mg) vs placebo from 16-20 weeks' gestation until 36 weeks' or delivery                                 |
| - Norman <sup>5</sup> | Multicentre, double-blind, placebo-controlled RCT   | Women with a twin pregnancy, with chorionicity established by scan <20 weeks' gestation, and attending the antenatal clinic during the recruitment period | Pregnancy complicated by a recognised structural or chromosomal fetal abnormality at the time of recruitment, contraindications to progesterone, planned cervical suture, planned elective delivery <34 weeks, planned intervention for twin-to-twin transfusion <22 weeks, higher order multiple pregnancy                                                                                                                                                                                    | Daily progesterone gel (90mg) vs placebo self-administered vaginally for 10 weeks from 24+0 weeks' gestation                                       |
| - Serra <sup>6</sup>  | Multicentre, double-blind, placebo-controlled RCT   | Maternal age ≥18 years, dichorionic diamniotic twin pregnancy diagnosed by ultrasound and written informed consent                                        | Singleton pregnancies, monochorionic twin pregnancies, triplets or higher order multiple pregnancies, elective cervical cerclage <14 weeks, history of hepatic problems or gestational cholestasis, abnormal liver enzymes, abnormal kidney function, local allergy to micronised natural progesterone, allergy to peanuts, recurrent vaginal bleeding, recurrent vaginal infections, fetal anomalies diagnosed by ultrasound, alcohol or illicit drug consumption, smoking ≥10 cigarettes/day | Two vaginal progesterone pessaries (400mg or 200mg) vs placebo self-inserted daily at bedtime from 20 weeks' gestation until 34 weeks' or delivery |
| - Nassar <sup>7</sup> | Single centre, double-blind, placebo-controlled RCT | Twin pregnancy diagnosed by ultrasound and maternal age ≥18 years, recruited at 12-20 weeks' gestation                                                    | Ultrasonographically diagnosed fetal anomalies, elective cervical cerclage <14 weeks, hypertension, diabetes mellitus, asthma, history of deep vein thrombosis, history of hepatic disease or abnormal liver enzymes, pre-existing renal disease or abnormal kidney function, seizure disorders                                                                                                                                                                                                | Weekly intramuscular injections of 17Pc (250mg) vs placebo from 16-20 weeks' gestation until 36 weeks'                                             |

|                           |                                                   |                                                                                                                                                                                                                                                   |                                                                                                                                                                                                                                                                                                                                                                                                                                                                                                                 |                                                                                                                                           |
|---------------------------|---------------------------------------------------|---------------------------------------------------------------------------------------------------------------------------------------------------------------------------------------------------------------------------------------------------|-----------------------------------------------------------------------------------------------------------------------------------------------------------------------------------------------------------------------------------------------------------------------------------------------------------------------------------------------------------------------------------------------------------------------------------------------------------------------------------------------------------------|-------------------------------------------------------------------------------------------------------------------------------------------|
| - Combs <sup>8</sup>      | Multicentre, double-blind, placebo-controlled RCT | Women with a dichorionic-diamniotic twin pregnancy at 15-23 weeks' gestation with a detailed ultrasound examination showing no major fetal anomalies                                                                                              | Age <18 years, taken any progestins >15 weeks, symptomatic uterine contractions, rupture of fetal membranes, contraindication to prolonging the pregnancy, pre-existing condition that might be worsened by progesterone, pre-existing medical condition carrying a high risk of preterm delivery                                                                                                                                                                                                               | Weekly intramuscular injections of 17Pc (250mg) vs placebo from 16-24 weeks' gestation until 34 weeks' or delivery                        |
| - Senat <sup>9</sup>      | Multicentre, open-label RCT                       | Women >18 years, carrying twins, asymptomatic, cervical length ≤25mm measured in the sagittal plane by routine transvaginal ultrasound according to the standard technique, who agreed to regular follow-up and provided written informed consent | Cervical dilatation >3cm, premature rupture of the membranes, placenta previa, monoamniotic pregnancy, signs of twin-to-twin transfusion syndrome, severe intrauterine growth restriction, known major structural or chromosomal fetal abnormality, death of 1 fetus, any maternal or fetal disease requiring preterm delivery, progesterone therapy before inclusion, ongoing anticonvulsant treatment, participation in any other treatment trial, twin gestations resulting from intentional fetal reduction | Twice weekly intramuscular injections of 17Pc (500mg) from 24+0-31+6 weeks' gestation until 36 weeks' or preterm delivery vs no treatment |
| - Aboulghar <sup>19</sup> | Single centre, placebo-controlled RCT             | Healthy pregnant women who conceived after IVF/ICSI between 18-24 weeks' gestation, with a first pregnancy, singleton or dichorionic twins, normal uterine and cervical anatomy, and normal fetal anatomy                                         | Previous pregnancy, serious fetal anomalies for which termination may be considered, intrauterine growth restriction, mono-chorionic and mono-amniotic twins, uterine anomalies, triplet pregnancies, cervical cerclage                                                                                                                                                                                                                                                                                         | Vaginal progesterone suppositories (200mg) vs placebo twice daily from randomisation until 37 weeks' gestation or onset of preterm birth  |
| - Wood <sup>20</sup>      | Multicentre, double-blind, placebo-controlled RCT | Pregnant women with two or more live fetuses confirmed at 16-18 week                                                                                                                                                                              | Placenta previa, pre-existing hypertension, known major fetal anomaly detected on ultrasound, monoamniotic monozygotic multiple pregnancies, maternal seizure                                                                                                                                                                                                                                                                                                                                                   | Daily progesterone gel (90mg) vs placebo self-administered vaginally from randomisation until 35+6 weeks' gestation                       |

|                          |                                                     |                                                                                      |                                        |                                                                                                                                                                                                                                                                                                                                                                         |                                                                                                        |
|--------------------------|-----------------------------------------------------|--------------------------------------------------------------------------------------|----------------------------------------|-------------------------------------------------------------------------------------------------------------------------------------------------------------------------------------------------------------------------------------------------------------------------------------------------------------------------------------------------------------------------|--------------------------------------------------------------------------------------------------------|
| - Cetingoz <sup>21</sup> | Single centre, double-blind, placebo-controlled RCT | Women with a twin pregnancy, prior spontaneous preterm birth or uterine malformation | ultrasound, 16+0-20+6 weeks' gestation | disorder, active or history of thromboembolic disease, maternal liver disease, known or suspected breast malignancy or pathology, known or suspected progesterone-dependent neoplasia, plans to move to another city during pregnancy, previous participation in this trial or other perinatal clinical trials during this pregnancy, known sensitivity to progesterone | Vaginal progesterone suppositories (100mg) vs placebo nightly from 24 weeks' gestation until 34 weeks' |
|--------------------------|-----------------------------------------------------|--------------------------------------------------------------------------------------|----------------------------------------|-------------------------------------------------------------------------------------------------------------------------------------------------------------------------------------------------------------------------------------------------------------------------------------------------------------------------------------------------------------------------|--------------------------------------------------------------------------------------------------------|

**Table S2.** Sample Size by Trial and Chorionicity

| <b>Trial</b> | <b>Number of Women With<br/>a Twin Pregnancy<sup>a</sup></b> | <b>Number (%) of Women<br/>with Monochorionic<br/>Pregnancy</b> | <b>Number (%) of Women<br/>with Dichorionic<br/>Pregnancy</b> | <b>Number (%) of Women<br/>with Unknown<br/>Chorionicity</b> |
|--------------|--------------------------------------------------------------|-----------------------------------------------------------------|---------------------------------------------------------------|--------------------------------------------------------------|
| Liem         | 795                                                          | 181 (22.8)                                                      | 609 (76.6)                                                    | 5 (0.6)                                                      |
| Rode         | 677                                                          | 100 (14.8)                                                      | 577 (85.2)                                                    | 0 (0.0)                                                      |
| Rouse        | 661                                                          | 103 (15.6)                                                      | 551 (83.4)                                                    | 7 (1.1)                                                      |
| Lim          | 650                                                          | 112 (17.2)                                                      | 538 (82.8)                                                    | 0 (0.0)                                                      |
| Norman       | 500                                                          | 92 (18.4)                                                       | 408 (81.6)                                                    | 0 (0.0)                                                      |
| Serra        | 290                                                          | 0 (0.0)                                                         | 290 (100.0)                                                   | 0 (0.0)                                                      |
| Nassar       | 286                                                          | 41 (14.3)                                                       | 222 (77.6)                                                    | 23 (8.0)                                                     |
| Combs        | 240                                                          | 0 (0.0)                                                         | 240 (100.0)                                                   | 0 (0.0)                                                      |
| Senat        | 165                                                          | 0 (0.0)                                                         | 0 (0.0)                                                       | 165 (100.0)                                                  |
| Aboulghar    | 92                                                           | 0 (0.0)                                                         | 92 (100.0)                                                    | 0 (0.0)                                                      |
| Wood         | 81                                                           | 0 (0.0)                                                         | 0 (0.0)                                                       | 81 (100.0)                                                   |
| Cetingoz     | 67                                                           | 9 (13.4)                                                        | 26 (38.8)                                                     | 32 (47.8)                                                    |

<sup>a</sup> Some trials included women with single or higher order multiple pregnancies but only women with twin pregnancies were included in this study

**Table S3.** Intraclass Correlation Coefficients for Composite Adverse Neonatal Outcome 1<sup>d</sup> by Trial and Chorionicity

| <b>Trial</b> | <b>Prevalence (%)</b> | <b>ICC (95% CI) - All Twins</b> | <b>ICC (95% CI) -<br/>Monochorionic Twins</b> | <b>ICC (95% CI) - Dichorionic<br/>Twins</b> |
|--------------|-----------------------|---------------------------------|-----------------------------------------------|---------------------------------------------|
| Liem         | 9.94                  | 0.68 (0.59, 0.76)               | 0.62 (0.43, 0.78)                             | 0.73 (0.62, 0.82)                           |
| Rouse        | 17.70                 | 0.70 (0.62, 0.77)               | 0.86 (0.70, 0.96)                             | 0.65 (0.56, 0.73)                           |
| Lim          | 15.25                 | 0.68 (0.59, 0.75)               | 0.76 (0.56, 0.90)                             | 0.66 (0.57, 0.75)                           |
| Norman       | 12.09                 | 0.54 (0.43, 0.67)               | 0.50 (0.23, 0.77)                             | 0.56 (0.41, 0.70)                           |
| Serra        | 14.66                 | 0.52 (0.38, 0.66)               | <sup>a</sup>                                  | 0.52 (0.38, 0.66)                           |
| Nassar       | 22.28                 | 0.68 (0.56, 0.78)               | 0.86 (0.43, 1.00)                             | 0.68 (0.55, 0.79)                           |
| Combs        | 14.04                 | 0.71 (0.56, 0.84)               | <sup>a</sup>                                  | 0.71 (0.56, 0.84)                           |
| Senat        | 29.93                 | 0.64 (0.49, 0.77)               | <sup>b</sup>                                  | <sup>b</sup>                                |
| Cetingoz     | 17.16                 | 0.65 (0.32, 0.88)               | <sup>c</sup>                                  | <sup>c</sup>                                |

<sup>a</sup> Monochorionic twins excluded from trial

<sup>b</sup> Chorionicity unknown

<sup>c</sup> Insufficient data to estimate ICC

<sup>d</sup> Includes perinatal death, respiratory distress syndrome, bronchopulmonary dysplasia, intraventricular haemorrhage, necrotising enterocolitis and sepsis

**Table S4.** Intraclass Correlation Coefficients for Composite Adverse Neonatal Outcome 2<sup>d</sup> by Trial and Chorionicity

| <b>Trial</b> | <b>Prevalence (%)</b> | <b>ICC (95% CI) - All Twins</b> | <b>ICC (95% CI) -<br/>Monochorionic Twins</b> | <b>ICC (95% CI) - Dichorionic<br/>Twins</b> |
|--------------|-----------------------|---------------------------------|-----------------------------------------------|---------------------------------------------|
| Liem         | 8.23                  | 0.65 (0.54, 0.74)               | 0.63 (0.42, 0.82)                             | 0.66 (0.54, 0.77)                           |
| Rode         | 11.87                 | 0.77 (0.69, 0.84)               | 0.82 (0.57, 0.96)                             | 0.76 (0.66, 0.84)                           |
| Rouse        | 17.08                 | 0.68 (0.60, 0.75)               | 0.85 (0.69, 0.96)                             | 0.62 (0.52, 0.71)                           |
| Lim          | 14.10                 | 0.67 (0.59, 0.76)               | 0.80 (0.56, 0.93)                             | 0.65 (0.55, 0.75)                           |
| Norman       | 10.85                 | 0.56 (0.44, 0.68)               | 0.62 (0.31, 0.86)                             | 0.54 (0.40, 0.68)                           |
| Serra        | 14.31                 | 0.54 (0.40, 0.68)               | <sup>a</sup>                                  | 0.54 (0.40, 0.68)                           |
| Nassar       | 20.53                 | 0.67 (0.54, 0.77)               | 0.94 (0.36, 1.00)                             | 0.64 (0.50, 0.76)                           |
| Combs        | 14.04                 | 0.71 (0.56, 0.84)               | <sup>a</sup>                                  | 0.71 (0.56, 0.84)                           |
| Senat        | 29.22                 | 0.62 (0.46, 0.74)               | <sup>b</sup>                                  | <sup>b</sup>                                |
| Wood         | 20.37                 | 0.65 (0.40, 0.87)               | <sup>b</sup>                                  | <sup>b</sup>                                |
| Cetingoz     | 17.16                 | 0.65 (0.32, 0.88)               | <sup>c</sup>                                  | <sup>c</sup>                                |

<sup>a</sup> Monochorionic twins excluded from trial

<sup>b</sup> Chorionicity unknown

<sup>c</sup> Insufficient data to estimate ICC

<sup>d</sup> Includes perinatal death, respiratory distress syndrome, intraventricular haemorrhage and necrotising enterocolitis

**Table S5.** Intraclass Correlation Coefficients for Admission to Neonatal Intensive Care Unit by Trial and Chorionicity

| <b>Trial</b> | <b>Prevalence (%)</b> | <b>ICC (95% CI) - All Twins</b> | <b>ICC (95% CI) -<br/>Monochorionic Twins</b> | <b>ICC (95% CI) - Dichorionic<br/>Twins</b> |
|--------------|-----------------------|---------------------------------|-----------------------------------------------|---------------------------------------------|
| Liem         | 13.05                 | 0.72 (0.64, 0.79)               | 0.67 (0.51, 0.80)                             | 0.75 (0.66, 0.83)                           |
| Rode         | 48.82                 | 0.86 (0.81, 0.89)               | 0.95 (0.85, 1.00)                             | 0.84 (0.79, 0.88)                           |
| Rouse        | 48.58                 | 0.81 (0.76, 0.85)               | 0.88 (0.74, 0.96)                             | 0.80 (0.74, 0.85)                           |
| Lim          | 18.31                 | 0.79 (0.72, 0.85)               | 0.84 (0.69, 0.94)                             | 0.77 (0.69, 0.84)                           |
| Norman       | 39.40                 | 0.79 (0.73, 0.84)               | 0.87 (0.74, 0.96)                             | 0.77 (0.70, 0.83)                           |
| Serra        | 11.90                 | 0.56 (0.40, 0.71)               | a                                             | 0.56 (0.40, 0.71)                           |
| Nassar       | 36.89                 | 0.80 (0.72, 0.87)               | c                                             | 0.76 (0.66, 0.84)                           |
| Combs        | 38.56                 | 0.79 (0.70, 0.86)               | a                                             | 0.79 (0.70, 0.86)                           |
| Senat        | 41.21                 | 0.85 (0.75, 0.93)               | b                                             | b                                           |
| Cetingoz     | 29.10                 | 0.68 (0.42, 0.86)               | c                                             | c                                           |

<sup>a</sup> Monochorionic twins excluded from trial

<sup>b</sup> Chorionicity unknown

<sup>c</sup> Insufficient data to estimate ICC



**Table S6.** Intraclass Correlation Coefficients for Birthweight by Trial and Chorionicity

| <b>Trial</b> | <b>Mean (SD)</b> | <b>ICC (95% CI) - All Twins</b> | <b>ICC (95% CI) -<br/>Monochorionic Twins</b> | <b>ICC (95% CI) - Dichorionic<br/>Twins</b> |
|--------------|------------------|---------------------------------|-----------------------------------------------|---------------------------------------------|
| Liem         | 2344 (637)       | 0.81 (0.77, 0.83)               | 0.83 (0.76, 0.88)                             | 0.80 (0.75, 0.83)                           |
| Rode         | 2434 (584)       | 0.80 (0.76, 0.83)               | 0.85 (0.77, 0.91)                             | 0.79 (0.74, 0.83)                           |
| Rouse        | 2259 (617)       | 0.85 (0.82, 0.87)               | 0.88 (0.83, 0.93)                             | 0.84 (0.80, 0.86)                           |
| Lim          | 2362 (683)       | 0.80 (0.75, 0.84)               | 0.78 (0.63, 0.88)                             | 0.81 (0.74, 0.85)                           |
| Norman       | 2325 (619)       | 0.79 (0.74, 0.83)               | 0.85 (0.76, 0.91)                             | 0.78 (0.72, 0.82)                           |
| Serra        | 2350 (508)       | 0.70 (0.62, 0.77)               | <sup>a</sup>                                  | 0.70 (0.62, 0.77)                           |
| Nassar       | 2241 (569)       | 0.78 (0.71, 0.83)               | 0.79 (0.62, 0.91)                             | 0.77 (0.69, 0.83)                           |
| Combs        | 2371 (534)       | 0.70 (0.60, 0.77)               | <sup>a</sup>                                  | 0.70 (0.60, 0.77)                           |
| Senat        | 2145 (534)       | 0.83 (0.77, 0.88)               | <sup>b</sup>                                  | <sup>b</sup>                                |
| Aboulghar    | 2345 (505)       | 0.62 (0.46, 0.77)               | <sup>a</sup>                                  | 0.62 (0.46, 0.77)                           |
| Wood         | 2291 (559)       | 0.75 (0.62, 0.86)               | <sup>b</sup>                                  | <sup>b</sup>                                |
| Cetingoz     | 2288 (562)       | 0.78 (0.59, 0.89)               | <sup>c</sup>                                  | <sup>c</sup>                                |

<sup>a</sup> Monochorionic twins excluded from trial

<sup>b</sup> Chorionicity unknown

<sup>c</sup> Insufficient data to estimate ICC

**Table S7.** Intraclass Correlation Coefficients for Birthweight <2500g by Trial and Chorionicity

| Trial     | Prevalence (%) | ICC (95% CI) - All Twins | ICC (95% CI) -      | ICC (95% CI) - Dichorionic |
|-----------|----------------|--------------------------|---------------------|----------------------------|
|           |                |                          | Monochorionic Twins | Twins                      |
| Liem      | 54.87          | 0.50 (0.44, 0.56)        | 0.47 (0.32, 0.60)   | 0.50 (0.43, 0.57)          |
| Rode      | 49.85          | 0.50 (0.43, 0.57)        | 0.61 (0.44, 0.78)   | 0.48 (0.41, 0.55)          |
| Rouse     | 61.95          | 0.61 (0.54, 0.67)        | 0.58 (0.35, 0.77)   | 0.60 (0.53, 0.67)          |
| Lim       | 51.85          | 0.52 (0.45, 0.59)        | 0.48 (0.31, 0.65)   | 0.53 (0.45, 0.60)          |
| Norman    | 56.69          | 0.48 (0.40, 0.56)        | 0.41 (0.21, 0.61)   | 0.49 (0.41, 0.58)          |
| Serra     | 57.96          | 0.47 (0.36, 0.57)        | <sup>a</sup>        | 0.47 (0.36, 0.57)          |
| Nassar    | 64.57          | 0.53 (0.43, 0.64)        | 0.45 (0.15, 0.72)   | 0.53 (0.41, 0.66)          |
| Combs     | 55.49          | 0.50 (0.39, 0.62)        | <sup>a</sup>        | 0.50 (0.39, 0.62)          |
| Senat     | 74.68          | 0.55 (0.39, 0.70)        | <sup>b</sup>        | <sup>b</sup>               |
| Aboulghar | 51.95          | 0.41 (0.20, 0.61)        | <sup>a</sup>        | 0.41 (0.20, 0.61)          |
| Wood      | 56.88          | 0.37 (0.16, 0.58)        | <sup>b</sup>        | <sup>b</sup>               |
| Cetingoz  | 56.72          | 0.71 (0.51, 0.88)        | <sup>c</sup>        | <sup>c</sup>               |

<sup>a</sup> Monochorionic twins excluded from trial

<sup>b</sup> Chorionicity unknown

<sup>c</sup> Insufficient data to estimate ICC

**Table S8.** Intraclass Correlation Coefficients for Birthweight <1500g by Trial and Chorionicity

| Trial    | Prevalence (%) | ICC (95% CI) - All Twins | ICC (95% CI) -<br>Monochorionic Twins | ICC (95% CI) - Dichorionic<br>Twins |
|----------|----------------|--------------------------|---------------------------------------|-------------------------------------|
| Liem     | 9.42           | 0.75 (0.66, 0.83)        | 0.71 (0.52, 0.89)                     | 0.76 (0.65, 0.84)                   |
| Rode     | 6.72           | 0.78 (0.68, 0.87)        | 0.44 (-0.03, 0.80)                    | 0.80 (0.68, 0.89)                   |
| Rouse    | 11.00          | 0.77 (0.68, 0.85)        | 0.72 (0.50, 0.88)                     | 0.79 (0.69, 0.87)                   |
| Lim      | 10.96          | 0.75 (0.66, 0.82)        | 0.90 (0.74, 1.00)                     | 0.72 (0.62, 0.81)                   |
| Norman   | 9.73           | 0.70 (0.58, 0.80)        | 0.73 (0.36, 0.93)                     | 0.71 (0.57, 0.83)                   |
| Serra    | 6.06           | 0.48 (0.29, 0.72)        | a                                     | 0.48 (0.29, 0.72)                   |
| Nassar   | 9.89           | 0.70 (0.51, 0.84)        | c                                     | 0.73 (0.55, 0.87)                   |
| Combs    | 7.59           | 0.71 (0.45, 0.87)        | a                                     | 0.71 (0.45, 0.87)                   |
| Senat    | 14.29          | 0.70 (0.38, 0.88)        | b                                     | b                                   |
| Wood     | 10.00          | 0.91 (0.63, 1.00)        | b                                     | b                                   |
| Cetingoz | 8.21           | 0.36 (-0.05, 0.92)       | c                                     | c                                   |

<sup>a</sup> Monochorionic twins excluded from trial

<sup>b</sup> Chorionicity unknown

<sup>c</sup> Insufficient data to estimate ICC

**Table S9.** Summary of Intraclass Correlation Coefficient Estimates for Neonatal Outcomes from Linear Mixed Effects Models Across Trials

| <b>Outcome</b>                                    | <b>Median (Range) ICC</b> | <b>Trials</b>           |
|---------------------------------------------------|---------------------------|-------------------------|
| Composite Adverse Neonatal Outcome 1 <sup>a</sup> | 0.68 (0.54-0.71)          | 5-9, 15, 17, 18, 21     |
| Composite Adverse Neonatal Outcome 2 <sup>b</sup> | 0.66 (0.56-0.77)          | 4-9, 15, 17, 18, 20, 21 |
| Perinatal Death                                   | 0.67 (0.16-0.79)          | 4, 5, 7, 15, 17, 18, 21 |
| Respiratory Distress Syndrome                     | 0.65 (0.50-0.74)          | 4-9, 15, 17, 18, 20, 21 |
| Bronchopulmonary Dysplasia                        | 0.51 (0.36-0.72)          | 5, 17, 18               |
| Intraventricular Haemorrhage                      | 0.37 (0.15-0.46)          | 4, 5, 17                |
| Necrotising Enterocolitis                         | 0.14 (0.14-0.15)          | 15, 18                  |
| Sepsis                                            | 0.40 (0.35-0.51)          | 4, 5, 7, 15, 17, 18     |
| Admission to Neonatal Intensive Care Unit         | 0.79 (0.56-0.86)          | 4-9, 15, 17, 18, 21     |
| Birthweight                                       | 0.78 (0.62-0.85)          | 4-9, 15, 17-21          |
| Birthweight <2500g                                | 0.50 (0.37-0.70)          | 4-9, 15, 17-21          |
| Birthweight <1500g                                | 0.72 (0.31-0.86)          | 4-9, 15, 17, 18, 20, 21 |

<sup>a</sup> Includes perinatal death, respiratory distress syndrome, bronchopulmonary dysplasia, intraventricular haemorrhage, necrotising enterocolitis and sepsis

<sup>b</sup> Includes perinatal death, respiratory distress syndrome, intraventricular haemorrhage and necrotising enterocolitis
